# Supplementary material for: La audición en educación infantil
Source: Royal Society of Chemistry journal article supplement (doi:10.1039/d1md00172h), 1996-01-01
Supplement: d1md00172h1.pdf [file d1md00172h1.pdf]

## **Identification of molecular glues of the SLP76 / 14-3-3 protein-protein interaction**

Lorenzo Soini<sup>a,d</sup>, Martin Redhead<sup>b</sup>, Marta Westwood<sup>e</sup>, Seppe Leysen<sup>c</sup>, Jeremy Davis<sup>d</sup>, and Christian Ottmann<sup>a,\*</sup>

<sup>a</sup>Laboratory of Chemical Biology, Department of Biomedical Engineering and Institute for Complex Molecular Systems, Eindhoven University of Technology, Eindhoven, The Netherlands;

<sup>b</sup>Exscientia ltd, Schrodinger Building, Oxford Science Park, Oxford, OX44GE

<sup>c</sup>Department of Structural Biology and Biophysics, UCB Celltech, Slough, UK;

<sup>d</sup>Department of Chemistry, UCB Celltech, Slough, UK

<sup>e</sup>Structural Biology, Discovery, Charles River, Chesterford Research Park, UK

Corresponding authors:

Christian Ottmann

[c.ottmann@tue.nl](mailto:c.ottmann@tue.nl)

Jeremy Davis

[Jeremy.Davis@ucb.com](mailto:Jeremy.Davis@ucb.com)

## Supportive Information

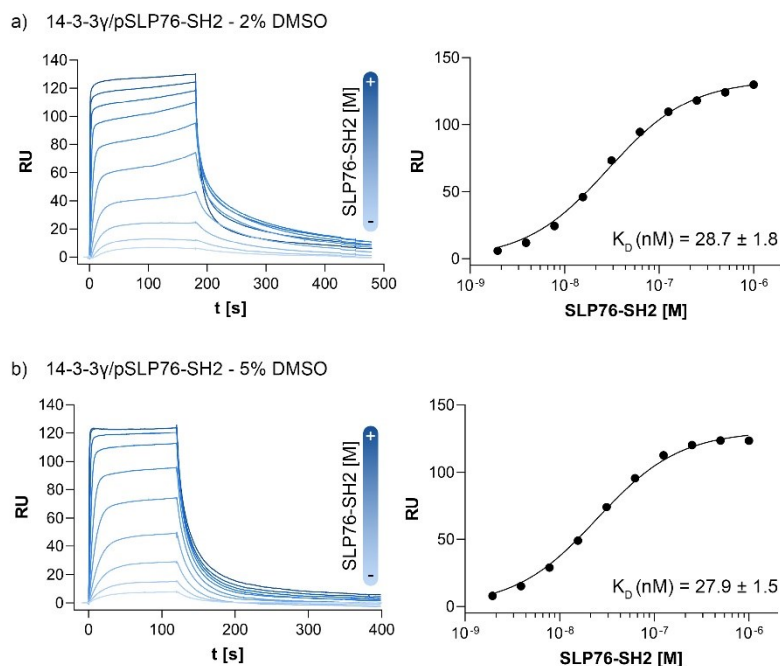

Figure S 1: SPR binding assay of SLP76-SH2 to 14-3-3γ at different DMSO concentrations. a) Sensorgram and respective binding curve extrapolated from reference points at equilibrium of SLP76-SH2 flowing over 14-3-3γ in the presence of 2% DMSO. b) Sensorgram and respective binding curve extrapolated from reference points at equilibrium of SLP76-SH2 flowing over 14-3-3γ in the presence of 5% DMSO. The  $K_D$  values has been extrapolated from the fitting model (One site - Specific binding model' on GraphPad Prism version 8.1.1 for Windows; GraphPad Software, [www.graphpad.com](http://www.graphpad.com).) and showed to be comparable the one to the other confirming a DMSO tolerance of the 14-3-3γ/SLP76-SH2 system in an SPR context. A  $K_D$  value calculated by Soini et al. in absence of DMSO (43 nM – ref.) is also comparable and along the previous results validate the chip surface for further studies.

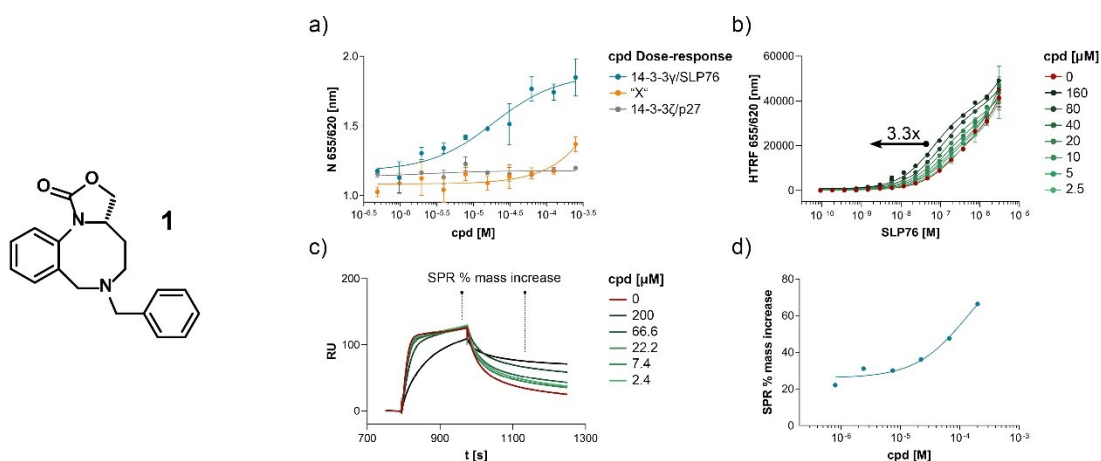

Figure S 2: Set of assays for Compound **1**. a) HTRF dose-response comparison. b) HTRF dose-ratio assay with EC50 fold increase. c) Sensorgrams at different compound concentrations. d) Plot and fitting curve derived from the sensorgram reference points showed in c).

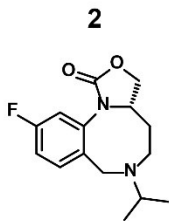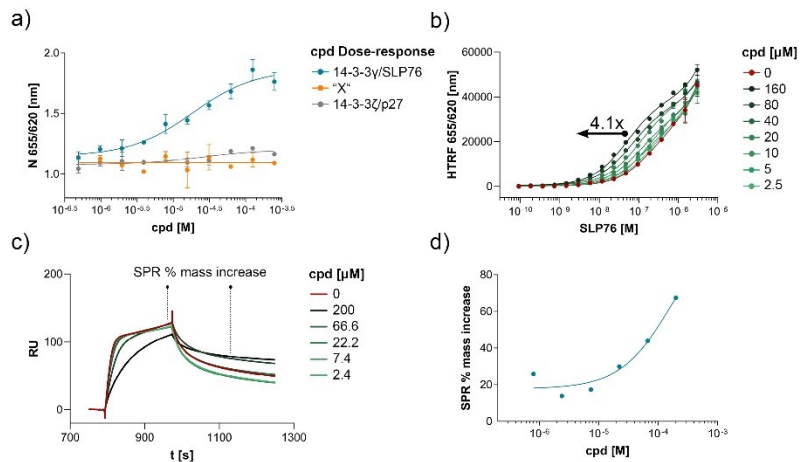

Figure S 3: Set of assays for Compound **2**. a) HTRF dose-response comparison. b) HTRF dose-ratio assay with  $EC_{50}$  fold increase. c) Sensorgrams at different compound concentrations. d) Plot and fitting curve derived from the sensorgram reference points showed in c).

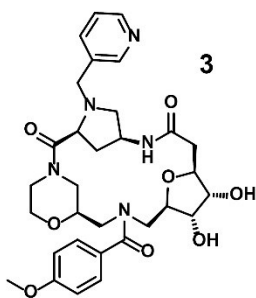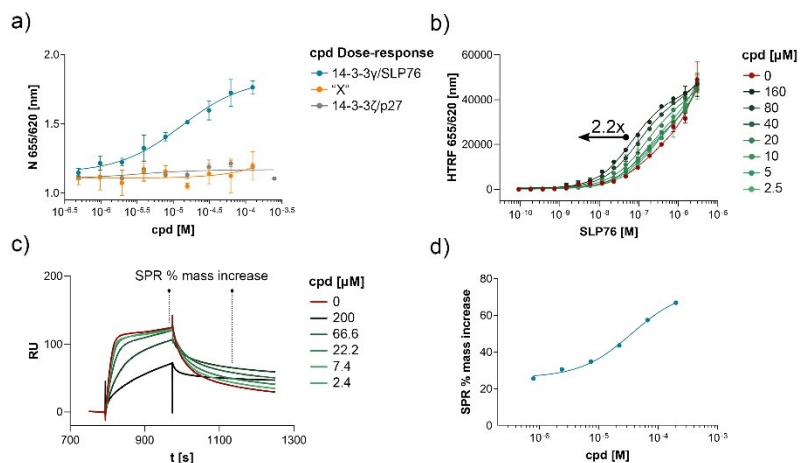

Figure S 4: Set of assays for Compound **3**. a) HTRF dose-response comparison. b) HTRF dose-ratio assay with  $EC_{50}$  fold increase. c) Sensorgrams at different compound concentrations. d) Plot and fitting curve derived from the sensorgram reference points showed in c).

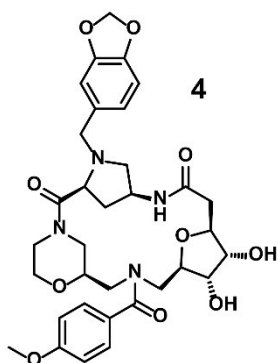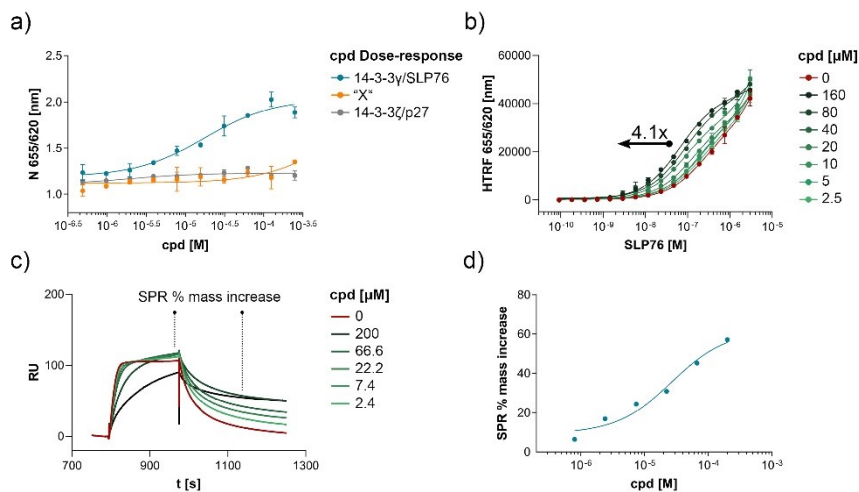

Figure S 5: Set of assays for Compound 4. a) HTRF dose-response comparison. b) HTRF dose-ratio assay with  $EC_{50}$  fold increase. c) Sensorgrams at different compound concentrations. d) Plot and fitting curve derived from the sensorgram reference points showed in c).

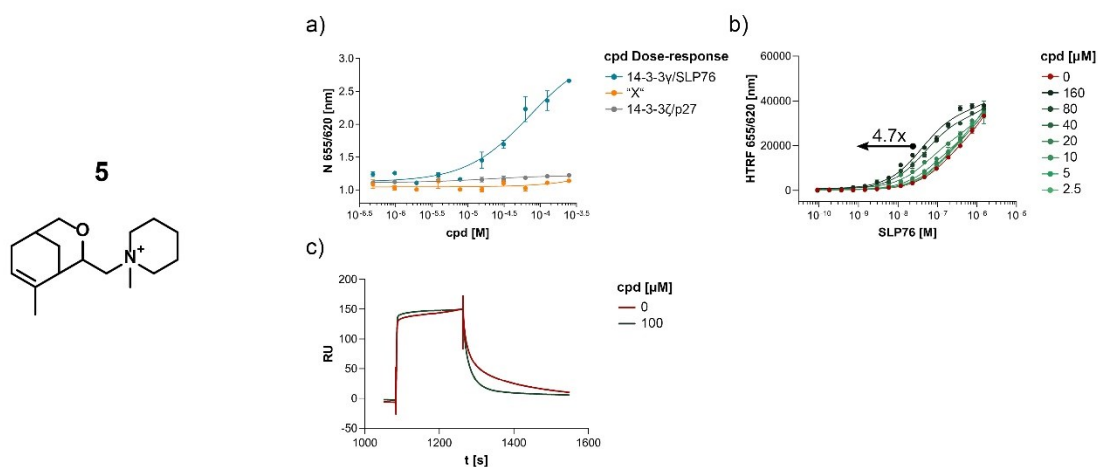

Figure S 6: Set of assays for Compound 5. a) HTRF dose-response comparison. b) HTRF dose-ratio assay with  $EC_{50}$  fold increase. c) Sensorgrams at different compound concentrations. d) Plot and fitting curve derived from the sensorgram reference points showed in c).

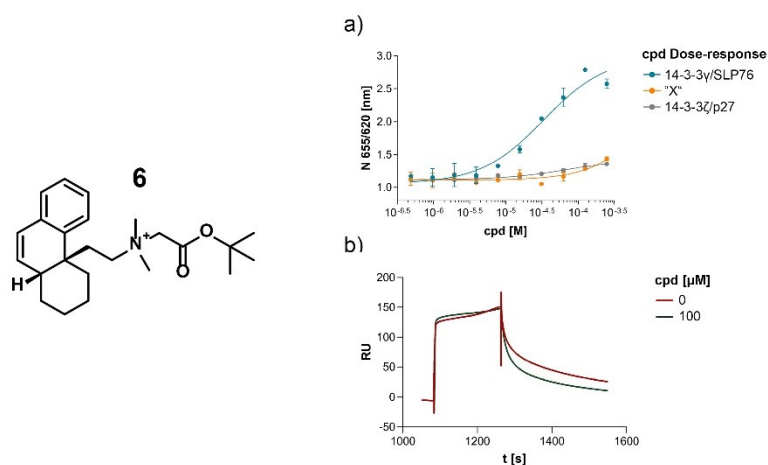

Figure S 7: Set of assays for Compound 6. a) HTRF dose-response comparison. b) HTRF dose-ratio assay with  $EC_{50}$  fold increase. c) Sensorgrams at different compound concentrations. d) Plot and fitting curve derived from the sensorgram reference points showed in c).

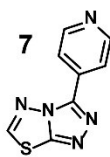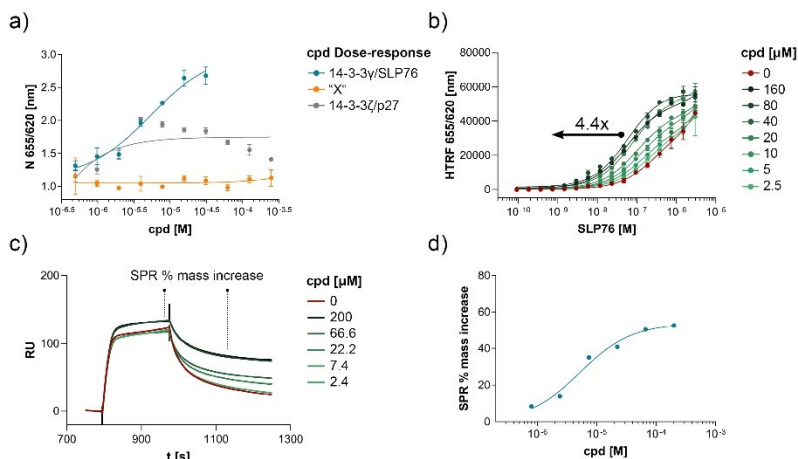

Figure S 8: Set of assays for Compound **7**. a) HTRF dose-response comparison. b) HTRF dose-ratio assay with  $EC_{50}$  fold increase. c) Sensorgrams at different compound concentrations. d) Plot and fitting curve derived from the sensorgram reference points showed in c).

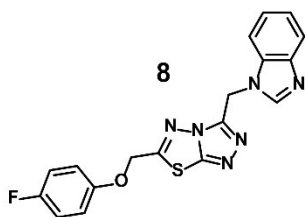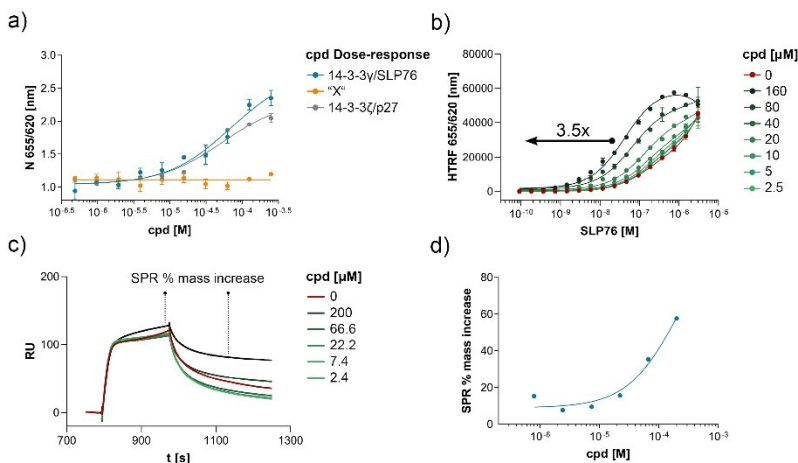

Figure S 9: Set of assays for Compound **8**. a) HTRF dose-response comparison. b) HTRF dose-ratio assay with  $EC_{50}$  fold increase. c) Sensorgrams at different compound concentrations. d) Plot and fitting curve derived from the sensorgram reference points showed in c).

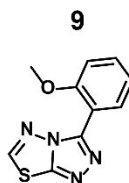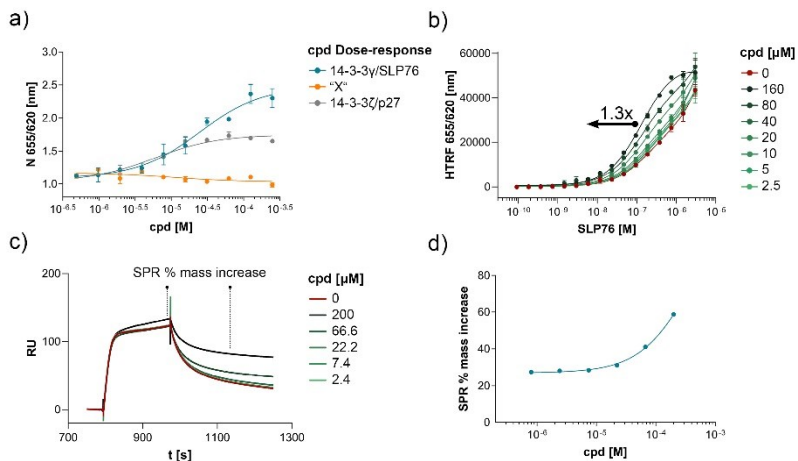

Figure S 10: Set of assays for Compound **9**. a) HTRF dose-response comparison. b) HTRF dose-ratio assay with  $EC_{50}$  fold increase. c) Sensorgrams at different compound concentrations. d) Plot and fitting curve derived from the sensorgram reference points showed in c).

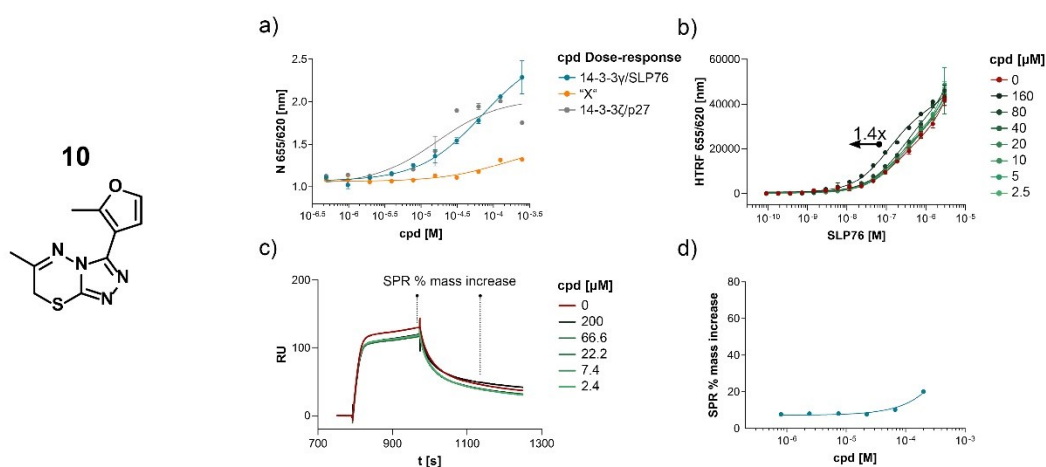

Figure S 11: Set of assays for Compound **10**. a) HTRF dose-response comparison. b) HTRF dose-ratio assay with  $EC_{50}$  fold increase. c) Sensorgrams at different compound concentrations. d) Plot and fitting curve derived from the sensorgram reference points showed in c).

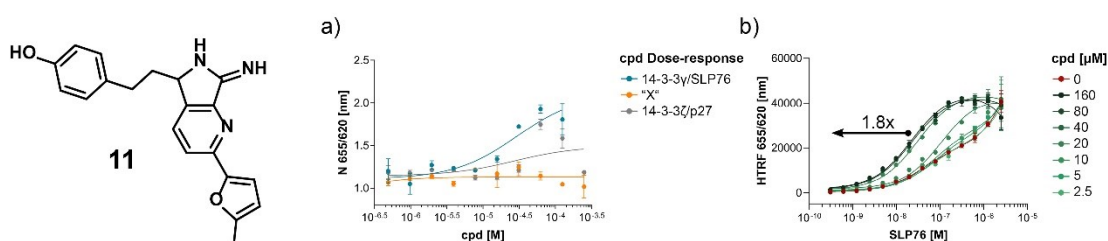

Figure S 12: Set of assays for Compound **11**. a) HTRF dose-response comparison. b) HTRF dose-ratio assay with  $EC_{50}$  fold increase. c) Sensorgrams at different compound concentrations. d) Plot and fitting curve derived from the sensorgram reference points showed in c).

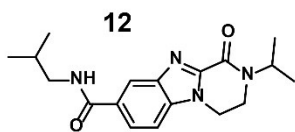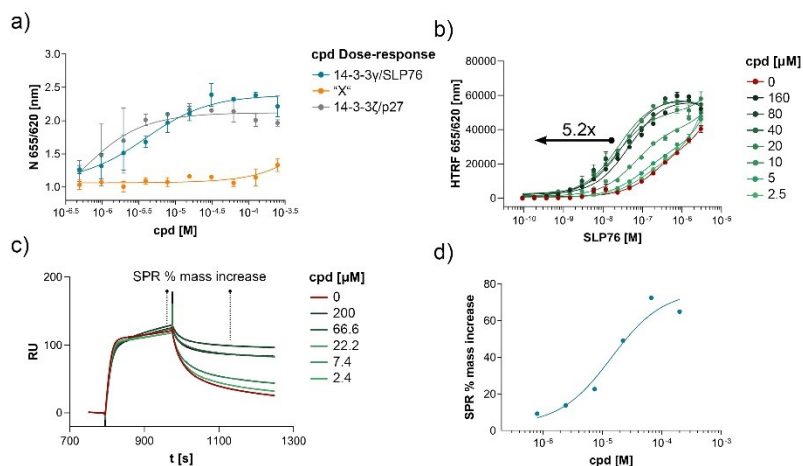

Figure S 13: Set of assays for Compound **12**. a) HTRF dose-response comparison. b) HTRF dose-ratio assay with  $EC_{50}$  fold increase. c) Sensorgrams at different compound concentrations. d) Plot and fitting curve derived from the sensorgram reference points showed in c).

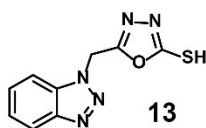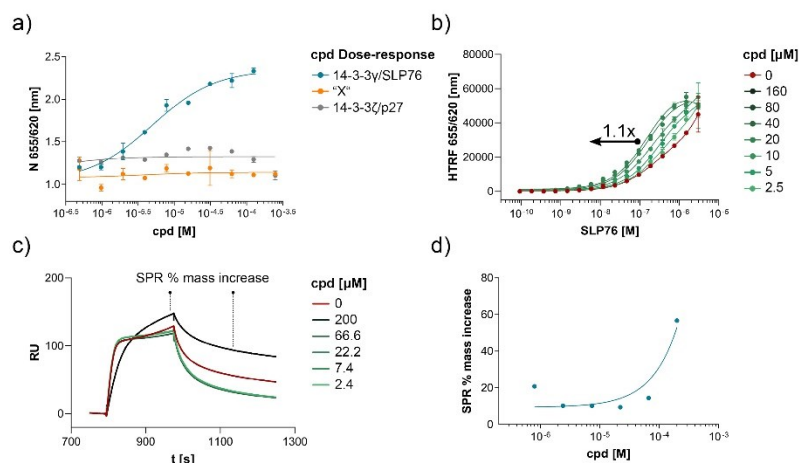

Figure S 14: Set of assays for Compound **13**. a) HTRF dose-response comparison. b) HTRF dose-ratio assay with  $EC_{50}$  fold increase. c) Sensorgrams at different compound concentrations. d) Plot and fitting curve derived from the sensorgram reference points showed in c).

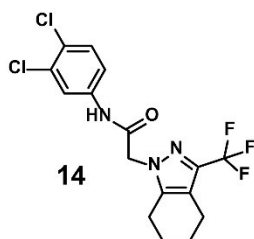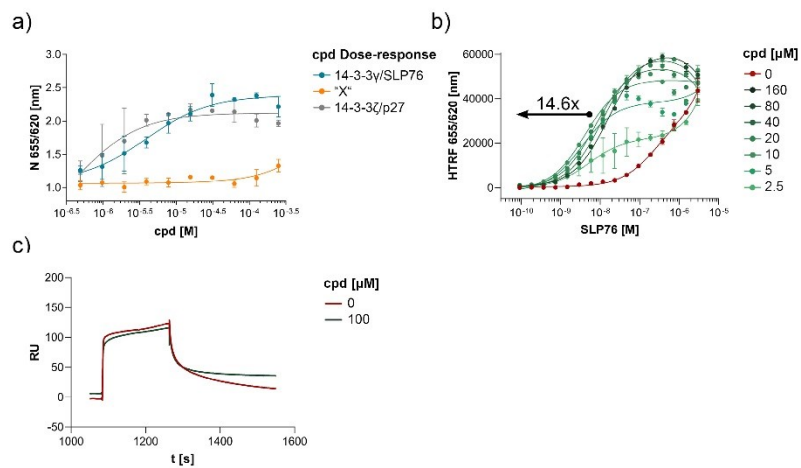

Figure S 15: Set of assays for Compound **14**. a) HTRF dose-response comparison. b) HTRF dose-ratio assay with  $EC_{50}$  fold increase. c) Sensorgrams at different compound concentrations. d) Plot and fitting curve derived from the sensorgram reference points showed in c).

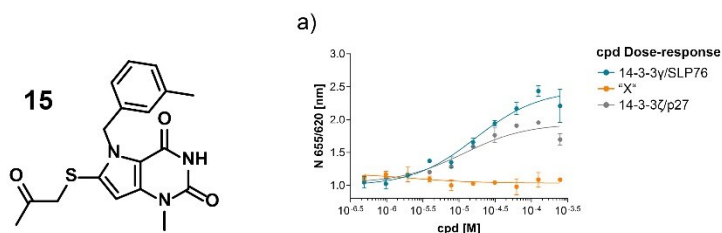

Figure S 16: Set of assays for Compound **15**. a) HTRF dose-response comparison. b) HTRF dose-ratio assay with  $EC_{50}$  fold increase. c) Sensorgrams at different compound concentrations. d) Plot and fitting curve derived from the sensorgram reference points showed in c).

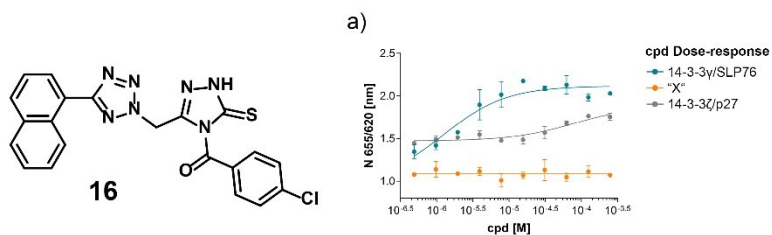

Figure S 17: Set of assays for Compound **16**. a) HTRF dose-response comparison. b) HTRF dose-ratio assay with  $EC_{50}$  fold increase. c) Sensorgrams at different compound concentrations. d) Plot and fitting curve derived from the sensorgram reference points showed in c).



Table S 1: Compounds molecular properties

| Cpd. ID | MW (Da) | Alog P * | TPSA (Å <sup>2</sup> ) † | CAS Number   | IUPAC Name                                                                                                                                                                     | Supplier                               |
|---------|---------|----------|--------------------------|--------------|--------------------------------------------------------------------------------------------------------------------------------------------------------------------------------|----------------------------------------|
| 1       | 308.4   | 3.18     | 32.8                     | 1797577-90-2 | (6S)-9-benzyl-4-oxa-2,9-diazatricyclo[9.4.0.02,6]pentadeca-1(11),12,14-trien-3-one                                                                                             | AnalytiCon Discovery, GmbH             |
| 2       | 278.3   | 2.53     | 32.8                     | 1796930-73-8 | (6S)-14-fluoro-9-propan-2-yl-4-oxa-2,9-diazatricyclo[9.4.0.02,6]pentadeca-1(15),11,13-trien-3-one                                                                              | AnalytiCon Discovery, GmbH             |
| 3       | 609.7   | -1.32    | 154.2                    | n/a          | (3S,6S,10S,11R,12S,13R,17R)-11,12-dihydroxy-15-(4-methoxybenzoyl)-4-(pyridin-3-ylmethyl)-18,22-dioxa-1,4,7,15-tetrazatetracyclo[15.3.1.13,6.110,13]tricosane-2,8-dione         | AnalytiCon Discovery, GmbH             |
| 4       | 652.7   | -0.41    | 159.5                    | n/a          | (3S,6S,10S,11R,12S,13R,17R)-4-(1,3-benzodioxol-5-ylmethyl)-11,12-dihydroxy-15-(4-methoxybenzoyl)-18,22-dioxa-1,4,7,15-tetrazatetracyclo[15.3.1.13,6.110,13]tricosane-2,8-dione | AnalytiCon Discovery, GmbH             |
| 5       | 250.4   | 1.42     | 9.2                      | 738575-09-2  | 1-methyl-1-[(8-methyl-3-oxabicyclo[3.3.1]non-7-en-2-yl)methyl]piperidin-1-ium                                                                                                  | ChemBridge Corporation                 |
| 6       | 400.5   | 3.32     | 35.5                     | 692728-26-0  | 2-[(4aS,10aR)-6-methoxy-2,3,4,10a-tetrahydro-1H-phenanthren-4a-yl]ethyl-dimethyl-[2-[(2-methylpropan-2-yl)oxy]-2-oxoethyl]azanium                                              | Chemieliva Pharmaceutical Product List |
| 7       | 203.2   | 0.30     | 84.2                     | 133847-06-0  | 3-pyridin-4-yl-[1,2,4]triazolo[3,4-b][1,3,4]thiadiazole                                                                                                                        | ChemBridge Corporation                 |
| 8       | 380.4   | 2.99     | 98.3                     | 791806-06-9  | 3-(benzimidazol-1-ylmethyl)-6-[(4-fluorophenoxy)methyl]-[1,2,4]triazolo[3,4-b][1,3,4]thiadiazole                                                                               | Specs                                  |
| 9       | 232.3   | 1.44     | 80.5                     | 1432902-04-9 | 3-(2-methoxyphenyl)-[1,2,4]triazolo[3,4-b][1,3,4]thiadiazole                                                                                                                   | Specs                                  |
| 10      | 234.3   | 1.29     | 81.5                     | 892690-26-5  | 6-methyl-3-(2-methylfuran-3-yl)-7H-[1,2,4]triazolo[3,4-b][1,3,4]thiadiazine                                                                                                    | Specs                                  |
| 11      | 333.4   | 3.76     | 82.1                     | n/a          | 4-[2-[7-imino-2-(5-methylfuran-2-yl)-5,6-dihydropyrrolo[3,4-b]pyridin-5-yl]ethyl]phenol                                                                                        | Chempartner                            |
| 12      | 328.4   | 2.32     | 67.2                     | n/a          | N-(2-methylpropyl)-1-oxo-2-propan-2-yl-3,4-dihydropyrazino[1,2-a]benzimidazole-8-carboxamide                                                                                   | ChemDiv                                |
| 13      | 233.2   | 1.69     | 108.4                    | 136715-68-9  | 5-(benzotriazol-1-ylmethyl)-1,3,4-oxadiazole-2-thiol                                                                                                                           | Maybridge, Ltd.                        |
| 14      | 392.2   | 5.20     | 46.9                     | 332943-31-4  | N-(3,4-dichlorophenyl)-2-[3-(trifluoromethyl)-4,5,6,7-tetrahydroindazol-1-yl]acetamide                                                                                         | Specs                                  |
| 15      | 358.4   | 2.43     | 109.6                    | 303973-50-4  | 3-methyl-7-[(3-methylphenyl)methyl]-8-(2-oxopropylsulfanyl)purine-2,6-dione                                                                                                    | ENAMINE Ltd.                           |
| 16      | 447.9   | 4.65     | 120.4                    | 144338-89-6  | (4-chlorophenyl)-[3-[(5-naphthalen-1-yltetrazol-2-yl)methyl]-5-sulfanylidene-1H-1,2,4-triazol-4-yl]methanone                                                                   | Specs                                  |

\* AlogP, calculated in Pipeline Pilot (Dassault Systemes) v 19; † Topological Polar Surface Area, calculated in Pipeline Pilot (Dassault Systemes) v 19
